# Supplementary material for: Structural Basis and Biological Consequences for JNK2/3 Isoform Selective Aminopyrazoles
Source: PubMed Central journal article supplement — Sci Rep. 2015 Jan 27;5:8047. doi: 10.1038/srep08047 (PMC4306959; doi:10.1038/srep08047), 2015-01-27
Supplement: srep08047-s1.pdf [file srep08047-s1.pdf]

SUPPLEMENT

**DRUG DISCOVERY; CHEMICAL BIOLOGY; BIOCHEMISTRY**

Philip LoGrasso, Phone: (561) 228-2230. Fax: (561) 228-3088. E-mail:  
lograsso@scripps.edu.

**Structural Basis and Biological Consequences for JNK2/3 Isoform Selective**

**Aminopyrazoles**

HaJeung Park, Sarah Iqbal, Pamela Hernandez, Rudy Mora, Ke Zheng, Yangbo Feng, and  
Philip LoGrasso

Department of Molecular Therapeutics and Translational Research Institute  
The Scripps Research Institute

130 Scripps Way #2A2, Jupiter, Florida 33458

**Supplemental Figure 1.** Stereo view of 2Fo-Fc electron density map of JNK3 39-402 and SR-11165 complex. The electron density is contoured at  $1.2\sigma$ . SR-11165 and L144 are shown in sticks. Map region corresponding to SR-11165 is highlighted in green.

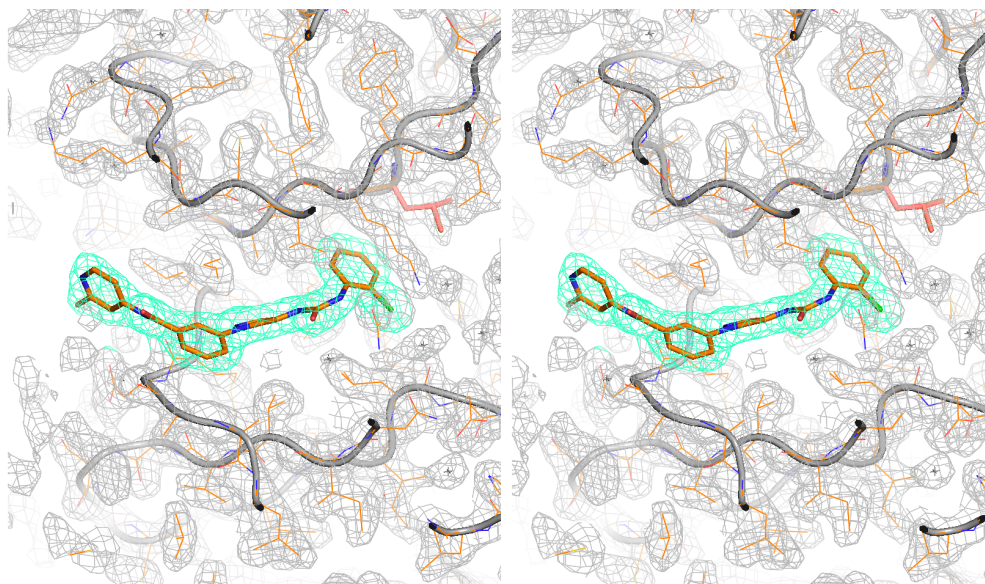

**Supplemental Figure 2.** Crystal structure for JNK3 L144I solved at 2.4Å. The isoleucine side chain is shown in red. Electron density map (upper panel) and electropherogram of sequencing reaction (lower panel) are shown.

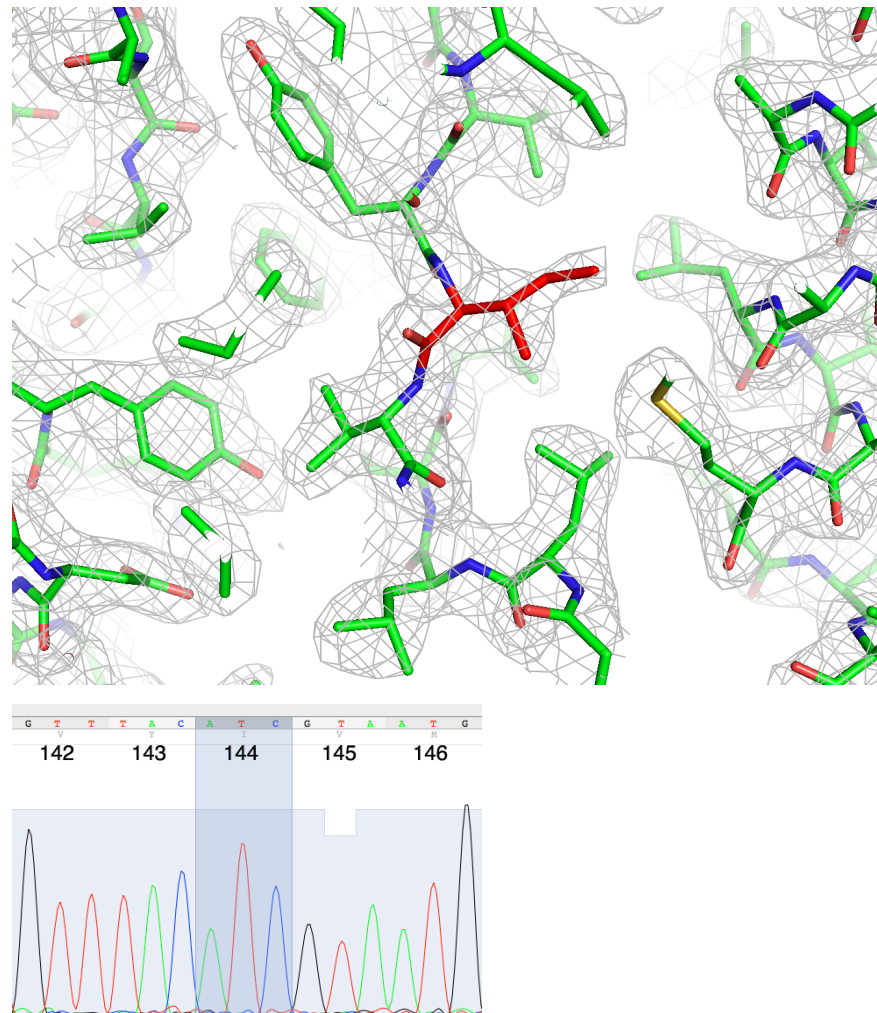

**Supplemental Figure 3:** Structure of SR-11404

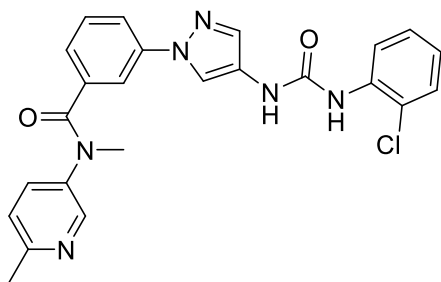

**Supplemental Table 1:** Data collection and refinement statistics

| <b>Crystal</b>                                                      | JNK3-SR11165                                   | JNK3-SR12326                                   | JNK3-SR12327                                   | JNK3-SR12130                                   |
|---------------------------------------------------------------------|------------------------------------------------|------------------------------------------------|------------------------------------------------|------------------------------------------------|
| <b>Data collection</b>                                              | LS-CAT 21-ID-G                                 | SSRL BL11-1                                    | In-house                                       | SSRL BL11-1                                    |
| Space group                                                         | P 2 <sub>1</sub> 2 <sub>1</sub> 2 <sub>1</sub> |
| Unit cell dimensions                                                |                                                |                                                |                                                |                                                |
| <i>a</i> , <i>b</i> , <i>c</i> (Å)                                  | 52.02, 71.33, 107.90                           | 52.36, 71.04, 107.8                            | 52.5, 71.44, 107.6                             | 53.30, 71.57, 107.55                           |
| α, β, γ (°)                                                         | 90, 90, 90                                     | 90, 90, 90                                     | 90, 90, 90                                     | 90, 90, 90                                     |
| Resolution (Å) <sup>a</sup>                                         | 75.08-2.01 (2.07-2.01)                         | 42.94-1.9 (1.94-1.9)                           | 47.19-2.65 (2.78-2.65)                         | 59.58-2.21 (2.27-2.21)                         |
| Total measured reflections                                          | 120,918                                        | 234,702                                        | 50,706                                         | 137,862                                        |
| Unique reflections                                                  | 27,374                                         | 32,380                                         | 12,217                                         | 20,779                                         |
| <i>R</i> <sub>merge</sub> [%] <sup>a</sup>                          | 6.3 (49.3)                                     | 5.9 (50.2)                                     | 10.9 (49.6)                                    | 6.5 (27.7)                                     |
| <i>I</i> / σ( <i>I</i> ) <sup>a</sup>                               | 8.9 (2.3)                                      | 18.1 (3.7)                                     | 9.8 (2.4)                                      | 12.3 (5.7)                                     |
| Completeness (%) <sup>a</sup>                                       | 99.9 (100)                                     | 99.8 (99.9)                                    | 99.4 (100)                                     | 97.9 (95.2)                                    |
| Redundancy <sup>a</sup>                                             | 4.4 (4.5)                                      | 7.2 (7.3)                                      | 4.2 (4.3)                                      | 6.6 (5.8)                                      |
| <b>Refinement</b>                                                   |                                                |                                                |                                                |                                                |
| Resolution (Å) <sup>a</sup>                                         | 21.76-2.01 (2.1-2.01)                          | 33.20-1.9 (1.96-1.9)                           | 47.9-2.65 (2.9-2.65)                           | 42.75-2.3 (2.44-2.3)                           |
| Number of reflections                                               | 23,665                                         | 32,321                                         | 12,151                                         | 18,463                                         |
| <i>R</i> <sub>work</sub> / <i>R</i> <sub>free</sub> <sup>a, b</sup> | 19.78/23.64<br>(20.97/26.88)                   | 20.42/23.6 (25.11-23.67)                       | 20.12/28.06 (22.94/32.73)                      | 19.41/25.65<br>(20.88/30.24)                   |
| Number of atoms                                                     |                                                |                                                |                                                |                                                |
| Protein                                                             | 2,838                                          | 2815                                           | 2,838                                          | 2838                                           |
| Ligand                                                              | 51                                             | 51                                             | 51                                             | 54                                             |
| Solvent                                                             | 305                                            | 159                                            | 40                                             | 151                                            |
| Average <i>B</i> -factors                                           |                                                |                                                |                                                |                                                |
| Protein                                                             | 44.9                                           | 46.54                                          | 54.96                                          | 69.16                                          |
| Ligand                                                              | -                                              | -                                              | -                                              | -                                              |
| Solvent                                                             | -                                              | -                                              | -                                              | -                                              |
| R.m.s. deviations from ideal geometry                               |                                                |                                                |                                                |                                                |
| Bond lengths (Å)                                                    | 0.01                                           | 0.01                                           | 0.009                                          | 0.01                                           |
| Bond angles (°)                                                     | 1.18                                           | 1.09                                           | 1.15                                           | 1.17                                           |

<sup>a</sup> Values in parentheses are for the highest resolution shell.

<sup>b</sup> *R*<sub>free</sub> was calculated as *R*<sub>work</sub> using the 5% of reflections which were selected randomly and omitted from refinement.

## Supplemental Methods

### Scheme 1. Synthesis of SR-11165

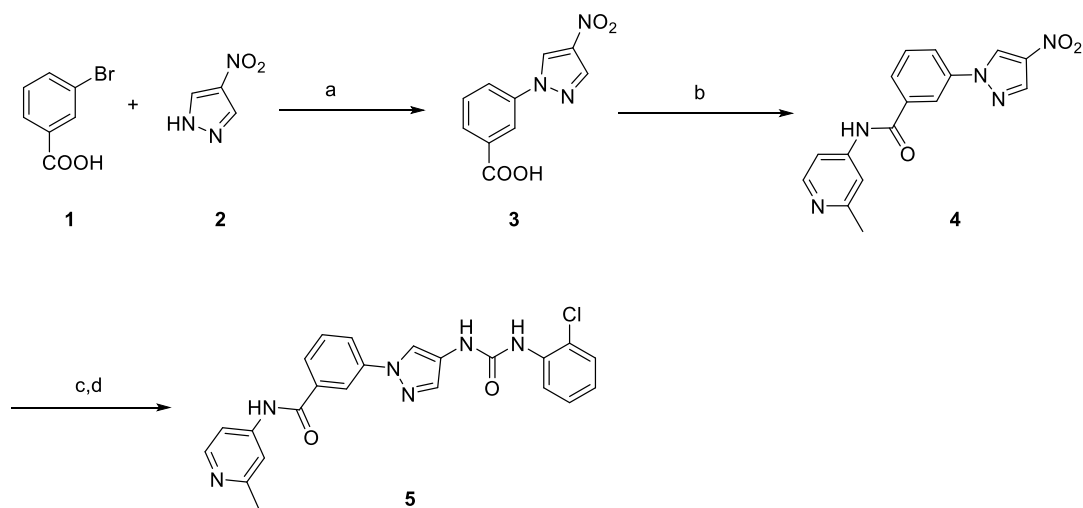

Reagents and Conditions: a. CuI, *trans*-*N,N*-dimethylcyclohexane-1,2-diamine, Cs<sub>2</sub>CO<sub>3</sub>, DMF, 100 °C; b. EDC, HOBT, DIEA, CH<sub>2</sub>Cl<sub>2</sub>, 25 °C; c. Pt/C, MeOH, H<sub>2</sub>; d. 1-chloro-2-isocyanatobenzene, CH<sub>2</sub>Cl<sub>2</sub>, 25 °C.

### 3-(4-nitro-1H-pyrazol-1-yl)benzoic acid

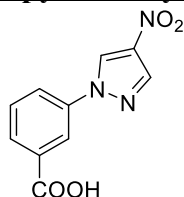

A mixture of 4-nitro-1H-pyrazole (10 mmol), 3-bromobenzoic acid (20 mmol), CuI (2.0 mmol), *trans*-*N,N*-dimethylcyclohexane-1,2-diamine (4.0 mmol) and Cs<sub>2</sub>CO<sub>3</sub> (30 mmol) in DMF (20 mL) was purged with argon and stirred for 12 h at 100 °C in a sealed tube. The reaction mixture was cooled, and filtered through a pad of silica gel and rinsed with EtOAc. The resulting solution was concentrated *in vacuo* to yield a crude residue which was purified by chromatography on silica gel (EtOAc/hexane) to provide 3-(4-nitro-1H-pyrazol-1-yl)benzoic acid, 75% yield. <sup>1</sup>H NMR (400 MHz, DMSO) δ 13.21 (s, 1H), 9.50 (s, 1H), 8.53 (s, 1H), 8.20 (dd, *J* = 8.3, 1.5 Hz, 1H), 8.06 (ddd, *J* = 8.2, 2.4, 1.0 Hz, 1H), 7.89 – 7.80 (m, 2H).

### 3-(4-amino-1H-pyrazol-1-yl)-N-(2-methylpyridin-4-yl)benzamide

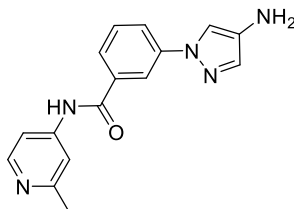

A solution of 3-(4-nitro-1H-pyrazol-1-yl)benzoic acid (5.0 mmol) in CH<sub>2</sub>Cl<sub>2</sub> (20 mL) was added EDC (10 mmol), HOBT (10 mmol) and diisopropyl ethyl amine (15 mmol) and stirred for 30 min. Then the 6-methylpyridin-3-amine (5.5 mmol) was added and the resulting mixture was stirred over night. Water (50 ml) was added to the reaction mixture and extracted with EtOAc (2x100 mL). The resulting solution was concentrated *in vacuo* to yield a crude product.

This intermediate was hydrogenated in anhydrous methanol (100 mL) in the presence of 5% Pt-C (1.0 g) under a balloon of hydrogen for 3 hour. The mixture was filtered through a Celite pad and evaporated. The residue was purified by chromatography on silica gel (dichloromethane/methanol) to give the 3-(4-amino-1H-pyrazol-1-yl)-N-(6-methylpyridin-3-yl)benzamide, 80% yield.

**3-(4-(3-(2-chlorophenyl)ureido)-1H-pyrazol-1-yl)-N-(2-methylpyridin-4-**

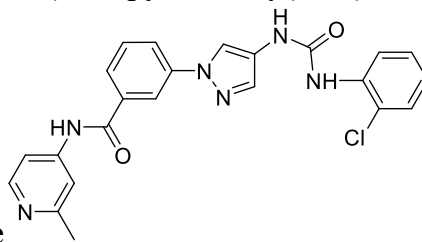

**yl)benzamide**

1-chloro-2-isocyanatobenzene (0.12 mmol) was added to 3-(4-amino-1H-pyrazol-1-yl)-N-(6-methylpyridin-3-yl)benzamide (0.1 mmol) in CH<sub>2</sub>Cl<sub>2</sub> (1.0 mL) at RT and stirred for 1 h. The solvent was evaporated and the residue was purified by reverse-phase preparative HPLC to give 3-(4-(3-(2-chlorophenyl)ureido)-1H-pyrazol-1-yl)-N-(6-methylpyridin-3-yl)benzamide, 70% yield. LC-MS: 447 (M + H). <sup>1</sup>H NMR (400 MHz, DMSO) δ 10.88 (s, 1H), 9.45 (s, 1H), 9.04 (s, 1H), 8.62 (s, 1H), 8.40 (s, 3H), 8.20 (dd, *J* = 8.3, 1.5 Hz, 1H), 8.09 (d, *J* = 8.2 Hz, 1H), 7.94 – 7.81 (m, 2H), 7.69 (t, *J* = 8.0 Hz, 1H), 7.63 (s, 1H), 7.47 (dd, *J* = 8.0, 1.4 Hz, 1H), 7.38 – 7.25 (m, 1H), 7.10 – 6.96 (m, 1H), 2.59 (s, 3H).

**N-(2-methylpyridin-4-yl)-3-(4-(3-(p-tolyl)ureido)-1H-pyrazol-1-yl)benzamide**

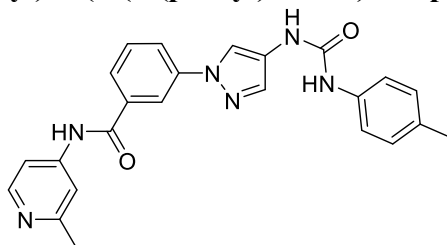

Procedures in **Scheme 1** were utilized to synthesize this compound SR-12130. LC-MS: 427 (M + H). <sup>1</sup>H NMR (400 MHz, DMSO) δ 11.43 (s, 1H), 8.72 (s, 1H), 8.70 – 8.61 (m,

2H), 8.60 (s, 1H), 8.39 (s, 1H), 8.12 (d,  $J = 8.1$  Hz, 2H), 8.05 (s, 1H), 7.88 (d,  $J = 7.8$  Hz, 1H), 7.83 (s, 1H), 7.71 (t,  $J = 8.0$  Hz, 1H), 7.37 (d,  $J = 8.4$  Hz, 2H), 7.09 (d,  $J = 8.3$  Hz, 2H), 2.67 (s, 3H), 2.25 (s, 3H).

**3-(4-(3-(4-chlorophenyl)ureido)-1H-pyrazol-1-yl)-N-(2-methylpyridin-4-yl)benzamide**

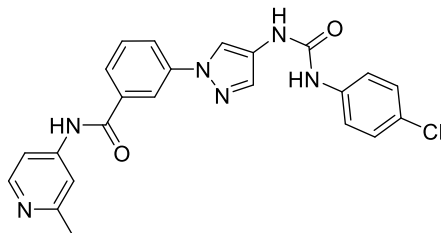

Procedures in **Scheme 1** were utilized to synthesize this compound SR-12103. LC-MS: 447 (M + H).  $^1\text{H NMR}$  (400 MHz, DMSO)  $\delta$  11.43 (s, 1H), 9.04 (s, 1H), 8.82 (s, 1H), 8.63 (d,  $J = 6.6$  Hz, 1H), 8.60 (s, 1H), 8.40 (d,  $J = 1.8$  Hz, 1H), 8.15 – 8.10 (m, 2H), 8.05 (d,  $J = 5.3$  Hz, 1H), 7.88 (d,  $J = 8.3$  Hz, 1H), 7.84 (s, 1H), 7.71 (t,  $J = 8.0$  Hz, 1H), 7.52 (d,  $J = 8.9$  Hz, 2H), 7.37 – 7.31 (m, 2H), 2.67 (s, 3H).

**N-(2-methylpyridin-4-yl)-3-(4-(3-phenylureido)-1H-pyrazol-1-yl)benzamide**

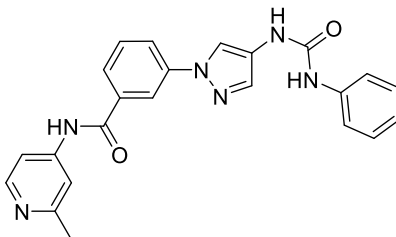

Procedures in **Scheme 1** were utilized to synthesize this compound SR-12326. LC-MS: 413 (M + H).  $^1\text{H NMR}$  (400 MHz, DMSO)  $\delta$  11.47 (s, 1H), 8.89 (s, 1H), 8.76 (s, 1H), 8.65 (d,  $J = 6.7$  Hz, 1H), 8.61 (s, 1H), 8.40 (t,  $J = 1.8$  Hz, 1H), 8.19 – 8.11 (m, 2H), 8.07 (d,  $J = 6.5$  Hz, 1H), 7.88 (d,  $J = 8.3$  Hz, 1H), 7.85 (s, 1H), 7.71 (t,  $J = 7.9$  Hz, 1H), 7.49 (d,  $J = 7.7$  Hz, 2H), 7.33 – 7.25 (m, 2H), 6.97 (t,  $J = 7.3$  Hz, 1H), 2.68 (s, 3H).

**3-(4-(3-(4-fluorophenyl)ureido)-1H-pyrazol-1-yl)-N-(2-methylpyridin-4-yl)benzamide**

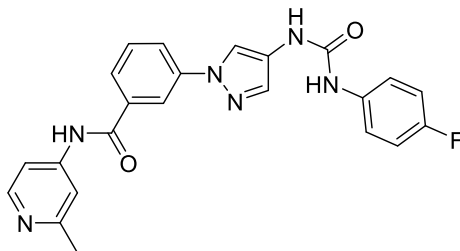

Procedures in **Scheme 1** were utilized to synthesize this compound SR-12327. LC-MS: 431 (M + H).  $^1\text{H NMR}$  (400 MHz, DMSO)  $\delta$  11.44 (s, 1H), 8.95 (s, 1H), 8.80 (s, 1H), 8.64 (d,  $J = 6.7$  Hz, 1H), 8.59 (s, 1H), 8.40 (t,  $J = 1.9$  Hz, 1H), 8.15 – 8.10 (m, 2H), 8.05

(d,  $J = 6.5$  Hz, 1H), 7.88 (d,  $J = 8.3$  Hz, 1H), 7.84 (s, 1H), 7.71 (t,  $J = 8.0$  Hz, 1H), 7.54 – 7.45 (m, 2H), 7.17 – 7.07 (m, 2H), 2.67 (s, 3H).
